# Supplementary material for: Application of UPLC-Q-TOF-MS with chemometric analysis and network pharmacology for comparison of different species: Paeonia lactiflora Pall. as an example
Source: Royal Society of Chemistry journal article supplement (doi:10.1039/d3nj05969c), 2024-01-01
Supplement: d3nj05969c1.pdf [file d3nj05969c1.pdf]

Table S1 Major signaling pathways enriched for six core targets

| <b>NO.</b> | <b>Name</b>                                          | <b>Targets</b>              |
|------------|------------------------------------------------------|-----------------------------|
| 1          | Proteoglycans in cancer                              | ACTB/AKT1/ESR1/SRC          |
| 2          | Rap1 signaling pathway                               | ACTB/AKT1/EGFR/SRC          |
| 3          | Chemical carcinogenesis - receptor activation        | AKT1/ESR1/HSP90AA1/SRC      |
| 4          | Estrogen signaling pathway                           | AKT1/HSP90AA1/EGFR/SRC/ESR1 |
| 5          | Lipid and atherosclerosis                            | AKT1/HSP90AA1/SRC           |
| 6          | Thyroid hormone signaling pathway                    | ACTB/AKT1/ESR1/SRC          |
| 7          | HIF-1 signaling pathway                              | AKT1/EGFR                   |
| 8          | EGFR tyrosine kinase inhibitor resistance            | AKT1/EGFR/SRC               |
| 9          | AGE-RAGE signaling pathway in diabetic complications | AKT1                        |
| 10         | Breast cancer                                        | AKT1/EGFR/ESR1              |
| 11         | Nitrogen metabolism                                  | EFGR                        |
| 12         | Prostate cancer                                      | AKT1/HSP90AA1/EGFR          |
| 13         | VEGF signaling pathway                               | AKT1/SRC                    |
| 14         | Endocrine resistance                                 | AKT1/ESR1/EGFR/SRC          |
| 15         | Central carbon metabolism in cancer                  | AKT1/EGFR/                  |
| 16         | Melanoma                                             | AKT1/EGFR                   |
| 17         | Non-small cell lung cancer                           | AKT1/EGFR                   |
| 18         | Glioma                                               | AKT1/EGFR                   |
| 19         | Bladder cancer                                       | EGFR/SRC                    |
| 20         | Carbohydrate digestion and absorption                | AKT1                        |

TableS2 Add sample recovery results of PRA

| Compound                        | Original quantity (μg) | Adding quantity (μg) | Measured quality (μg) | Sample recovery (%) | Average recovery (%) | RSD (%) |
|---------------------------------|------------------------|----------------------|-----------------------|---------------------|----------------------|---------|
| paeoniflorin                    | 144.1608               | 150.00               | 286.7466              | 95.06               | 98.4398              | 2.47    |
|                                 | 143.9010               | 150.00               | 290.1122              | 97.47               |                      |         |
|                                 | 144.1750               | 150.00               | 294.1634              | 99.99               |                      |         |
|                                 | 144.5430               | 150.00               | 293.4953              | 99.30               |                      |         |
|                                 | 144.0930               | 150.00               | 297.7224              | 102.42              |                      |         |
|                                 | 145.9820               | 150.00               | 290.5731              | 96.39               |                      |         |
| albiflorin                      | 41.730                 | 48.00                | 88.9320               | 98.34               | 100.1089             | 2.59    |
|                                 | 41.712                 | 48.00                | 89.0485               | 98.62               |                      |         |
|                                 | 41.093                 | 48.00                | 89.6286               | 101.12              |                      |         |
|                                 | 40.883                 | 48.00                | 87.3548               | 96.82               |                      |         |
|                                 | 40.532                 | 48.00                | 88.9809               | 100.94              |                      |         |
|                                 | 40.257                 | 48.00                | 90.5757               | 104.83              |                      |         |
| oxypaeoniflorin                 | 1.2381                 | 1.40                 | 2.6681                | 102.14              | 98.6415              | 2.33    |
|                                 | 1.2530                 | 1.40                 | 2.6615                | 100.61              |                      |         |
|                                 | 1.2320                 | 1.40                 | 2.6141                | 98.72               |                      |         |
|                                 | 1.2620                 | 1.40                 | 2.5961                | 95.29               |                      |         |
|                                 | 1.3130                 | 1.40                 | 2.6651                | 96.58               |                      |         |
|                                 | 1.3420                 | 1.40                 | 2.7210                | 98.50               |                      |         |
| gallic acid                     | 6.8720                 | 6.40                 | 13.0625               | 96.73               | 98.3994              | 2.78    |
|                                 | 6.8745                 | 6.40                 | 13.3197               | 100.71              |                      |         |
|                                 | 6.7920                 | 6.40                 | 13.0471               | 97.74               |                      |         |
|                                 | 6.8760                 | 6.40                 | 13.4884               | 103.32              |                      |         |
|                                 | 6.9010                 | 6.40                 | 13.0552               | 96.16               |                      |         |
|                                 | 6.8920                 | 6.40                 | 13.0199               | 95.75               |                      |         |
| catechin                        | 4.9184                 | 5.20                 | 10.0151               | 98.01               | 97.4019              | 1.41    |
|                                 | 5.0010                 | 5.20                 | 9.9640                | 95.44               |                      |         |
|                                 | 4.8820                 | 5.20                 | 9.8791                | 96.10               |                      |         |
|                                 | 4.9910                 | 5.20                 | 10.1216               | 98.67               |                      |         |
|                                 | 4.9830                 | 5.20                 | 10.1469               | 99.31               |                      |         |
|                                 | 4.9180                 | 5.20                 | 9.9561                | 96.89               |                      |         |
| 1,2,3,4,6-O-Pentagalloylglucose | 2.5362                 | 2.50                 | 5.1381                | 104.08              | 101.7876             | 2.53    |
|                                 | 2.5380                 | 2.50                 | 5.1268                | 103.55              |                      |         |
|                                 | 2.5540                 | 2.50                 | 5.0324                | 99.13               |                      |         |
|                                 | 2.4590                 | 2.50                 | 5.0343                | 103.01              |                      |         |
|                                 | 2.5370                 | 2.50                 | 5.1267                | 103.59              |                      |         |
|                                 | 2.6010                 | 2.50                 | 5.0350                | 97.36               |                      |         |

TableS3 Add sample recovery results of PRR

| Compound                        | Original quantity<br>( $\mu\text{g}$ ) | Adding quantity<br>( $\mu\text{g}$ ) | Measured quality<br>( $\mu\text{g}$ ) | Sample recovery<br>(%) | Average recovery<br>(%) | RSD<br>(%) |
|---------------------------------|----------------------------------------|--------------------------------------|---------------------------------------|------------------------|-------------------------|------------|
| paeoniflorin                    | 212.5364                               | 240.00                               | 459.8839                              | 103.06                 | 101.9084                | 2.41       |
|                                 | 211.9834                               | 240.00                               | 443.4297                              | 96.44                  |                         |            |
|                                 | 213.0294                               | 240.00                               | 459.7618                              | 102.81                 |                         |            |
|                                 | 212.9003                               | 240.00                               | 460.6358                              | 103.22                 |                         |            |
|                                 | 212.0943                               | 240.00                               | 459.4886                              | 103.08                 |                         |            |
|                                 | 213.3094                               | 240.00                               | 460.1340                              | 102.84                 |                         |            |
| albiflorin                      | 179.9166                               | 182.00                               | 369.8512                              | 104.36                 | 102.5090                | 2.06       |
|                                 | 179.2110                               | 182.00                               | 368.2383                              | 103.86                 |                         |            |
|                                 | 180.3820                               | 182.00                               | 359.9978                              | 98.69                  |                         |            |
|                                 | 178.3920                               | 182.00                               | 367.1357                              | 103.71                 |                         |            |
|                                 | 179.3240                               | 182.00                               | 368.3588                              | 103.87                 |                         |            |
|                                 | 180.4540                               | 182.00                               | 363.4962                              | 100.57                 |                         |            |
| oxypaeoniflorin                 | 6.6781                                 | 5.00                                 | 11.4500                               | 95.44                  | 101.5518                | 3.16       |
|                                 | 6.6660                                 | 5.00                                 | 11.6448                               | 99.58                  |                         |            |
|                                 | 6.6820                                 | 5.00                                 | 11.8142                               | 102.64                 |                         |            |
|                                 | 6.2350                                 | 5.00                                 | 11.3618                               | 102.54                 |                         |            |
|                                 | 6.6540                                 | 5.00                                 | 11.8714                               | 104.35                 |                         |            |
|                                 | 6.3630                                 | 5.00                                 | 11.6014                               | 104.77                 |                         |            |
| gallic acid                     | 15.9910                                | 16.2                                 | 31.9684                               | 98.63                  | 101.5874                | 2.24       |
|                                 | 16.0110                                | 16.2                                 | 32.9960                               | 104.85                 |                         |            |
|                                 | 15.9876                                | 16.2                                 | 32.5389                               | 102.17                 |                         |            |
|                                 | 16.0926                                | 16.2                                 | 32.5589                               | 101.64                 |                         |            |
|                                 | 15.9926                                | 16.2                                 | 31.9960                               | 98.79                  |                         |            |
|                                 | 15.9840                                | 16.2                                 | 32.7437                               | 103.45                 |                         |            |
| catechin                        | 16.7894                                | 16.60                                | 34.1473                               | 104.57                 | 100.2828                | 3.40       |
|                                 | 16.7810                                | 16.60                                | 33.8274                               | 102.69                 |                         |            |
|                                 | 16.7910                                | 16.60                                | 33.2053                               | 98.88                  |                         |            |
|                                 | 16.7730                                | 16.60                                | 33.9209                               | 103.30                 |                         |            |
|                                 | 16.7320                                | 16.60                                | 32.7165                               | 96.29                  |                         |            |
|                                 | 16.7850                                | 16.60                                | 32.7157                               | 95.97                  |                         |            |
| 1,2,3,4,6-O-Pentagalloylglucose | 19.8915                                | 20.20                                | 39.4641                               | 96.89                  | 96.2004                 | 0.62       |
|                                 | 19.8880                                | 20.20                                | 39.2905                               | 96.05                  |                         |            |
|                                 | 19.9010                                | 20.20                                | 39.4290                               | 96.67                  |                         |            |
|                                 | 19.8730                                | 20.20                                | 39.2916                               | 96.13                  |                         |            |
|                                 | 19.9030                                | 20.20                                | 39.1012                               | 95.04                  |                         |            |
|                                 | 19.8910                                | 20.20                                | 39.3661                               | 96.41                  |                         |            |

Table S4 Compounds identified from chemical markers of PRA

| Samples name                    | Category | Paeoniflorin (%) | Albiflorin (%) | Oxypaeoniflorin (%) | Gallic acid (%) | catechin (%) | 1,2,3,4,6-O-Pentagalloyl glucose (%) |
|---------------------------------|----------|------------------|----------------|---------------------|-----------------|--------------|--------------------------------------|
| BS-34                           | I        | 2.444            | 0.678          | 0.034               | 0.181           | 0.044        | 0.115                                |
| BS-35                           | I        | 2.142            | 0.753          | 0.022               | 0.105           | 0.070        | 0.238                                |
| BS-36                           | I        | 2.946            | 0.656          | 0.041               | 0.207           | 0.060        | 0.108                                |
| BS-37                           | I        | 2.988            | 0.674          | 0.044               | 0.211           | 0.067        | 0.264                                |
| BS-38                           | I        | 2.444            | 0.654          | 0.034               | 0.176           | 0.046        | 0.106                                |
| <b>Average mass of Class I</b>  |          | 2.593            | 0.683          | 0.035               | 0.176           | 0.057        | 0.166                                |
| BS-3                            | II       | 2.455            | 0.562          | 0.023               | 0.101           | 0.055        | 0.020                                |
| BS-9                            | II       | 2.466            | 0.668          | 0.022               | 0.111           | 0.065        | 0.028                                |
| BS-10                           | II       | 2.363            | 0.689          | 0.023               | 0.116           | 0.066        | 0.084                                |
| BS-14                           | II       | 2.315            | 0.524          | 0.020               | 0.093           | 0.050        | 0.005                                |
| BS-19                           | II       | 2.327            | 0.494          | 0.019               | 0.095           | 0.050        | 0.015                                |
| BS-20                           | II       | 2.390            | 0.488          | 0.019               | 0.096           | 0.047        | 0.061                                |
| <b>Average mass of Class II</b> |          | 2.385            | 0.587          | 0.021               | 0.102           | 0.055        | 0.035                                |
| BS-1                            | III      | 1.950            | 0.372          | 0.016               | 0.104           | 0.038        | 0.005                                |
| BS-2                            | III      | 1.833            | 0.371          | 0.015               | 0.097           | 0.038        | 0.005                                |
| BS-4                            | III      | 1.699            | 0.572          | 0.017               | 0.086           | 0.056        | 0.005                                |
| BS-5                            | III      | 1.903            | 0.315          | 0.013               | 0.073           | 0.034        | 0.005                                |
| BS-6                            | III      | 1.948            | 0.270          | 0.012               | 0.070           | 0.030        | 0.005                                |
| BS-7                            | III      | 2.152            | 0.483          | 0.024               | 0.128           | 0.072        | 0.165                                |
| BS-8                            | III      | 2.218            | 0.480          | 0.026               | 0.126           | 0.078        | 0.016                                |
| BS-11                           | III      | 2.284            | 0.500          | 0.026               | 0.114           | 0.068        | 0.007                                |
| BS-12                           | III      | 2.058            | 0.411          | 0.020               | 0.106           | 0.047        | 0.005                                |
| BS-13                           | III      | 1.495            | 0.534          | 0.016               | 0.077           | 0.050        | 0.005                                |
| BS-15                           | III      | 1.746            | 0.344          | 0.015               | 0.099           | 0.032        | 0.005                                |

|                        |     |       |       |       |       |       |       |
|------------------------|-----|-------|-------|-------|-------|-------|-------|
| BS-16                  | III | 1.786 | 0.384 | 0.016 | 0.092 | 0.036 | 0.005 |
| BS-17                  | III | 2.261 | 0.466 | 0.019 | 0.094 | 0.042 | 0.005 |
| BS-18                  | III | 2.165 | 0.409 | 0.015 | 0.090 | 0.037 | 0.005 |
| BS-21                  | III | 2.290 | 0.435 | 0.023 | 0.118 | 0.072 | 0.005 |
| BS-22                  | III | 2.194 | 0.417 | 0.019 | 0.120 | 0.048 | 0.005 |
| BS-23                  | III | 2.003 | 0.388 | 0.013 | 0.099 | 0.031 | 0.005 |
| BS-24                  | III | 2.148 | 0.425 | 0.014 | 0.098 | 0.035 | 0.017 |
| BS-25                  | III | 1.773 | 0.336 | 0.014 | 0.080 | 0.032 | 0.005 |
| BS-26                  | III | 2.127 | 0.363 | 0.016 | 0.104 | 0.034 | 0.005 |
| BS-27                  | III | 2.092 | 0.470 | 0.020 | 0.115 | 0.053 | 0.005 |
| BS-28                  | III | 1.876 | 0.422 | 0.018 | 0.103 | 0.045 | 0.005 |
| BS-29                  | III | 2.024 | 0.468 | 0.020 | 0.123 | 0.047 | 0.015 |
| BS-30                  | III | 2.147 | 0.392 | 0.014 | 0.093 | 0.037 | 0.012 |
| BS-31                  | III | 1.802 | 0.480 | 0.015 | 0.107 | 0.053 | 0.034 |
| BS-32                  | III | 2.106 | 0.421 | 0.018 | 0.095 | 0.048 | 0.032 |
| BS-33                  | III | 2.341 | 0.441 | 0.018 | 0.124 | 0.048 | 0.047 |
| <b>Average mass of</b> |     |       |       |       |       |       |       |
| <b>Class III</b>       |     | 2.016 | 0.421 | 0.017 | 0.101 | 0.046 | 0.016 |

---

Table S5 Compounds identified from chemical markers of PRR

| Samples name                    | Category | Paeoniflorin (%) | Albiflorin (%) | Oxypaeoniflorin (%) | Gallic acid (%) | catechin (%) | 1,2,3,4,6-O-Pentagalloyl glucose (%) |
|---------------------------------|----------|------------------|----------------|---------------------|-----------------|--------------|--------------------------------------|
| CS-9                            | I        | 2.491            | 1.119          | 0.030               | 0.165           | 0.003        | 0.069                                |
| CS-10                           | I        | 2.577            | 1.611          | 0.045               | 0.220           | 0.020        | 0.212                                |
| CS-11                           | I        | 2.646            | 1.641          | 0.044               | 0.229           | 0.019        | 0.250                                |
| CS-12                           | I        | 2.309            | 0.225          | 0.093               | 0.159           | 0.004        | 0.098                                |
| CS-15                           | I        | 2.078            | 1.545          | 0.049               | 0.100           | 0.014        | 0.011                                |
| CS-16                           | I        | 2.732            | 0.132          | 0.112               | 0.119           | 0.007        | 0.112                                |
| CS-19                           | I        | 1.831            | 1.475          | 0.048               | 0.078           | 0.002        | 0.014                                |
| CS-20                           | I        | 1.873            | 1.482          | 0.048               | 0.078           | 0.001        | 0.032                                |
| CS-23                           | I        | 1.874            | 1.289          | 0.040               | 0.103           | 0.009        | 0.012                                |
| CS-24                           | I        | 1.877            | 1.000          | 0.027               | 0.127           | 0.004        | 0.010                                |
| CS-27                           | I        | 1.801            | 1.031          | 0.028               | 0.129           | 0.005        | 0.016                                |
| CS-28                           | I        | 2.722            | 1.197          | 0.032               | 0.175           | 0.003        | 0.447                                |
| CS-29                           | I        | 2.236            | 0.214          | 0.093               | 0.158           | 0.004        | 0.069                                |
| CS-31                           | I        | 1.961            | 1.432          | 0.047               | 0.089           | 0.012        | 0.010                                |
| CS-32                           | I        | 2.472            | 0.140          | 0.105               | 0.109           | 0.007        | 0.193                                |
| <b>Average mass of Class I</b>  |          | 2.237            | 1.101          | 0.056               | 0.137           | 0.008        | 0.132                                |
| CS-21                           | II       | 3.506            | 0.146          | 0.144               | 0.134           | 0.019        | 0.394                                |
| CS-22                           | II       | 4.014            | 0.106          | 0.150               | 0.083           | 0.017        | 0.395                                |
| CS-33                           | II       | 4.068            | 0.109          | 0.149               | 0.084           | 0.017        | 0.392                                |
| CS-34                           | II       | 3.194            | 0.131          | 0.130               | 0.117           | 0.022        | 0.556                                |
| <b>Average mass of Class II</b> |          | 3.696            | 0.123          | 0.143               | 0.105           | 0.019        | 0.434                                |
| CS-1                            | III      | 2.581            | 2.479          | 0.073               | 0.210           | 0.033        | 0.347                                |
| CS-2                            | III      | 2.830            | 2.313          | 0.063               | 0.241           | 0.035        | 0.396                                |

|                        |     |       |       |       |       |       |       |
|------------------------|-----|-------|-------|-------|-------|-------|-------|
| CS-3                   | III | 2.279 | 2.075 | 0.061 | 0.184 | 0.032 | 0.206 |
| CS-4                   | III | 2.284 | 2.023 | 0.060 | 0.184 | 0.030 | 0.264 |
| CS-5                   | III | 2.346 | 2.340 | 0.052 | 0.222 | 0.024 | 0.390 |
| CS-6                   | III | 2.626 | 2.032 | 0.076 | 0.185 | 0.031 | 0.313 |
| CS-7                   | III | 2.818 | 1.786 | 0.084 | 0.173 | 0.021 | 0.428 |
| CS-8                   | III | 2.386 | 2.154 | 0.060 | 0.159 | 0.016 | 0.286 |
| CS-13                  | III | 3.009 | 2.790 | 0.099 | 0.182 | 0.059 | 0.562 |
| CS-14                  | III | 2.405 | 1.696 | 0.063 | 0.167 | 0.023 | 0.468 |
| CS-17                  | III | 2.394 | 1.700 | 0.064 | 0.167 | 0.023 | 0.594 |
| CS-18                  | III | 2.933 | 2.776 | 0.082 | 0.230 | 0.032 | 0.643 |
| CS-25                  | III | 2.975 | 2.359 | 0.068 | 0.236 | 0.034 | 1.161 |
| CS-26                  | III | 2.548 | 2.493 | 0.056 | 0.232 | 0.025 | 1.039 |
| CS-30                  | III | 2.827 | 2.197 | 0.085 | 0.199 | 0.032 | 0.954 |
| CS-35                  | III | 2.842 | 1.781 | 0.082 | 0.171 | 0.016 | 0.623 |
| CS-36                  | III | 2.581 | 2.479 | 0.073 | 0.210 | 0.033 | 0.347 |
| <b>Average mass of</b> |     |       |       |       |       |       |       |
| <b>Class III</b>       |     | 2.630 | 2.187 | 0.071 | 0.196 | 0.029 | 0.542 |

---

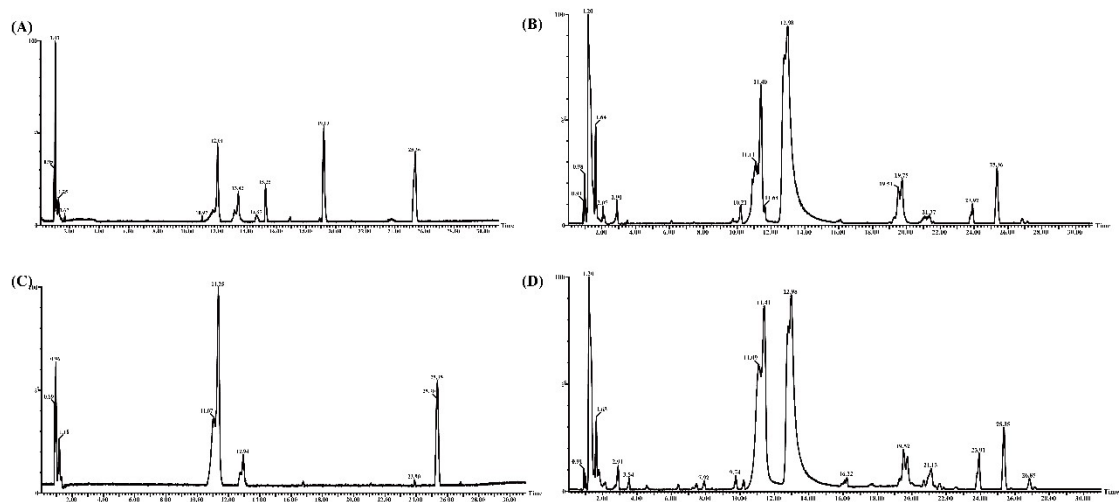

Fig. S1 BPI chromatograms of PRA and PRR in positive and negative ion modes.

(A) Positive ion mode of PRA sample, (B) negative ion mode of PRA sample. (C) positive ion mode of PRR sample, (D) negative ion mode of PRA sample.

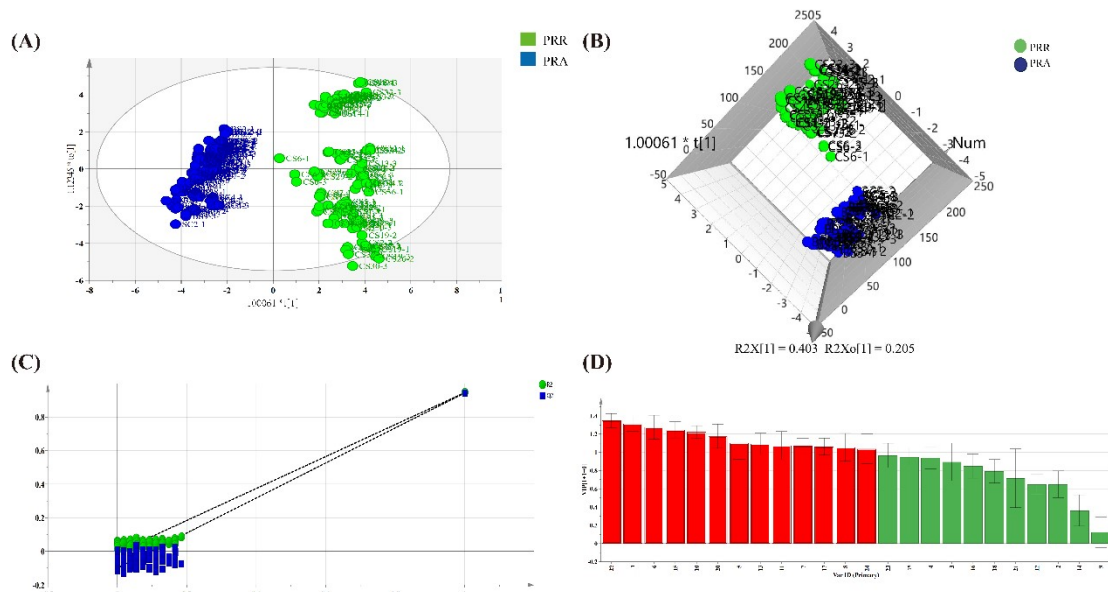

Fig. S2 OPLS-DA results of PRA and PRR.

(A) OPLS-DA scatter score plot, (B) 3D chart, (C) Cross-validation model, (D) VIP plot.



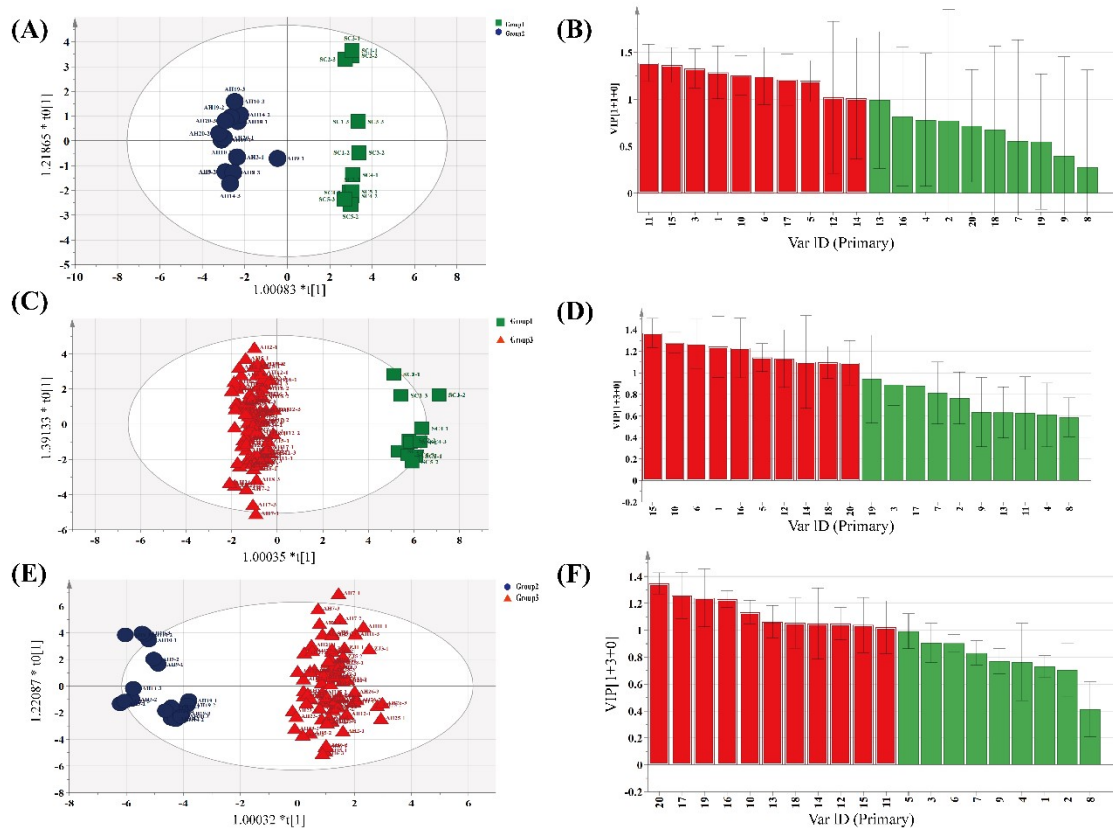

Fig. S3 OPLS-DA score plot and VIP plot for PRA.

(A) OPLS-DA score plot of Group 1 and Group 2, (B) VIP plot of Group 1 and Group 2, (C) OPLS-DA score plot of Group 1 and Group 3, (D) VIP plot of Group 1 and Group 3, (E) OPLS-DA score plot of Group 2 and Group 3, (F) VIP plot of Group 2 and Group 3.

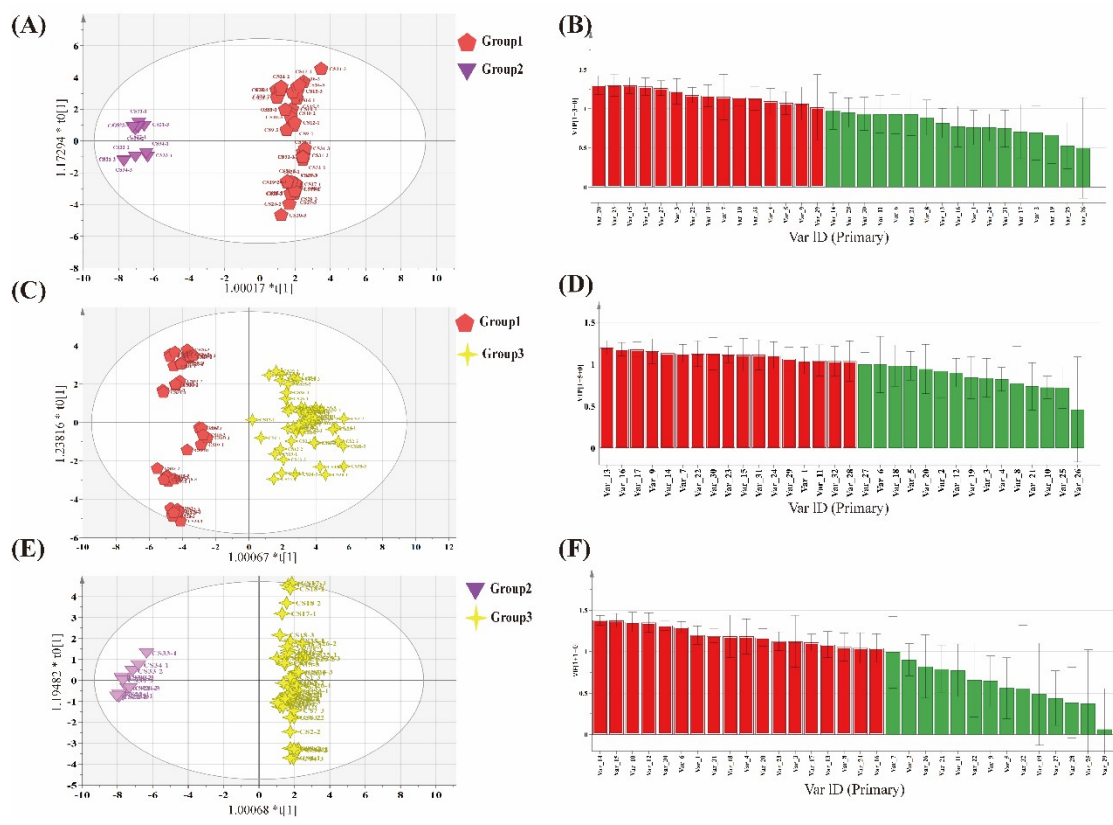

Fig. S4 OPLS-DA score plot and VIP plot for PRR.

(A)OPLS-DA score plot of Group 1 and Group 2, (B)VIP plot of Group 1 and Group 2, (C)OPLS-DA score plot of Group1 and Group 3, (D)VIP plot of Group1 and Group 3, (E)OPLS-DA score plot of Group2 and Group3, (F)VIP plot of Group2 and Group3.

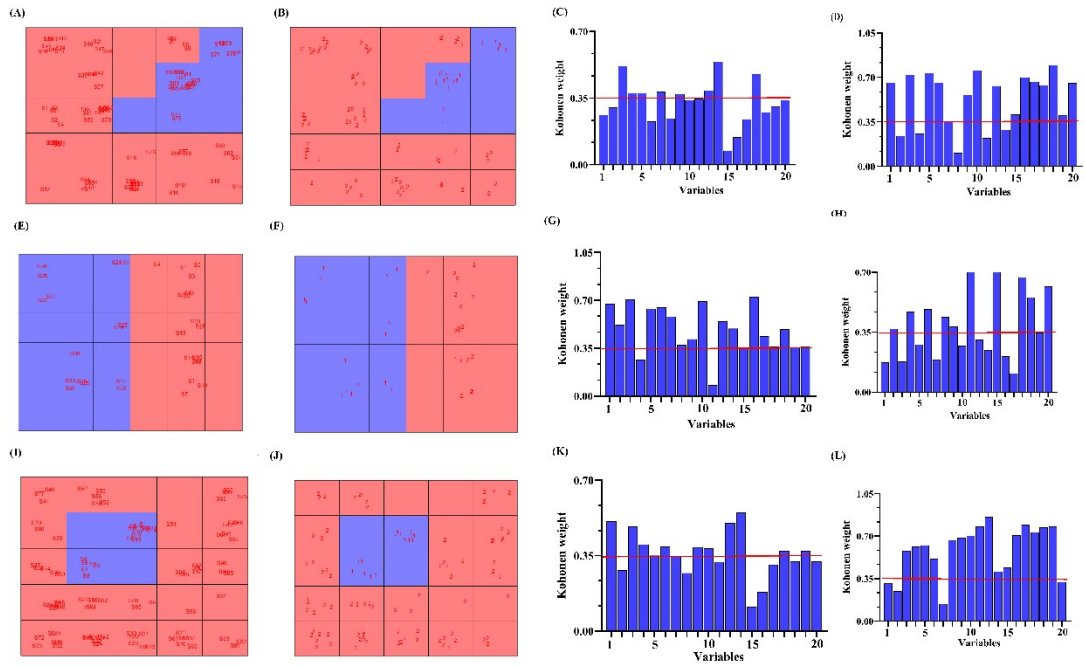

Fig. S5 Kohonen map of PRA samples.

(A) distribution maps of G1 and G2 , (B) the assigned groups to samples, (C) weight chart of G1 in two categories (G1 and G2), (D) weight chart of G2 in two categories (G1 and G2), (E) distribution maps of G1 and G3, (F) the assigned groups to samples, (G) weight chart of G1 in two categories (G1 and G3), (H) weight chart of G3 in two categories (G1 and G3), (I) distribution maps of G2 and G3, (J) the assigned groups to samples, (K) weight chart of G2 in two categories (G2 and G3), (L) weight chart of G3 in two categories (G2 and G3).

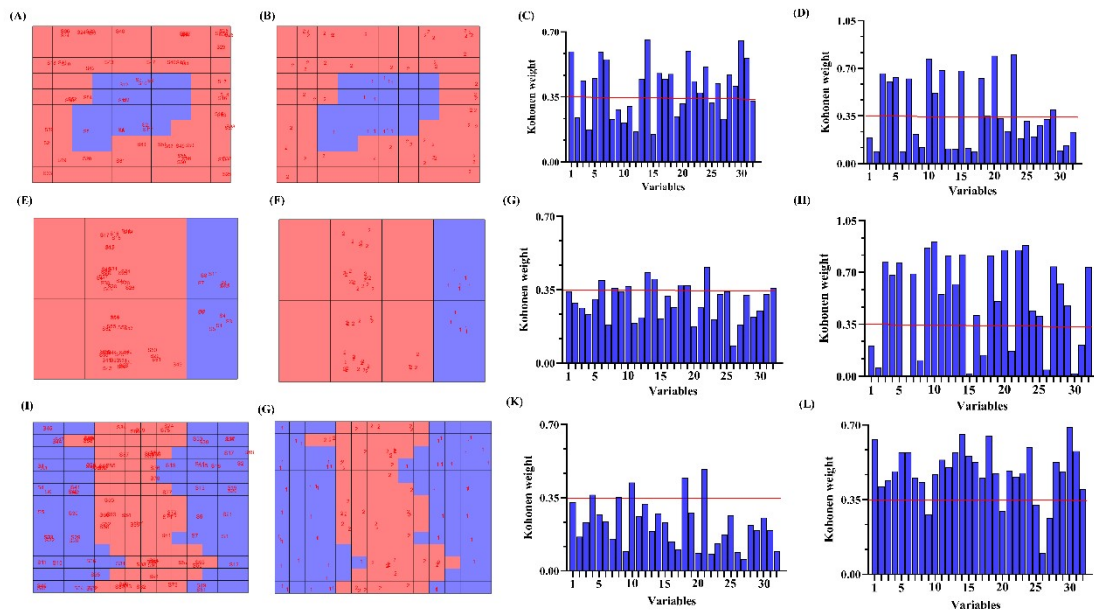

Fig.S6 Kohonen map of PRR samples.

(A) distribution maps of G1 and G2 , (B) the assigned groups to samples, (C) weight chart of G1 in two categories (G1 and G2), (D) weight chart of G2 in two categories (G1 and G2), (E) distribution maps of G1 and G3, (F) the assigned groups to samples, (G) weight chart of G1 in two categories (G1 and G3), (H) weight chart of G3 in two categories (G1 and G3), (I) distribution maps of G2 and G3, (J) the assigned groups to samples, (K) weight chart of G2 in two categories (G2 and G3), (L) weight chart of G3 in two categories (G2 and G3).

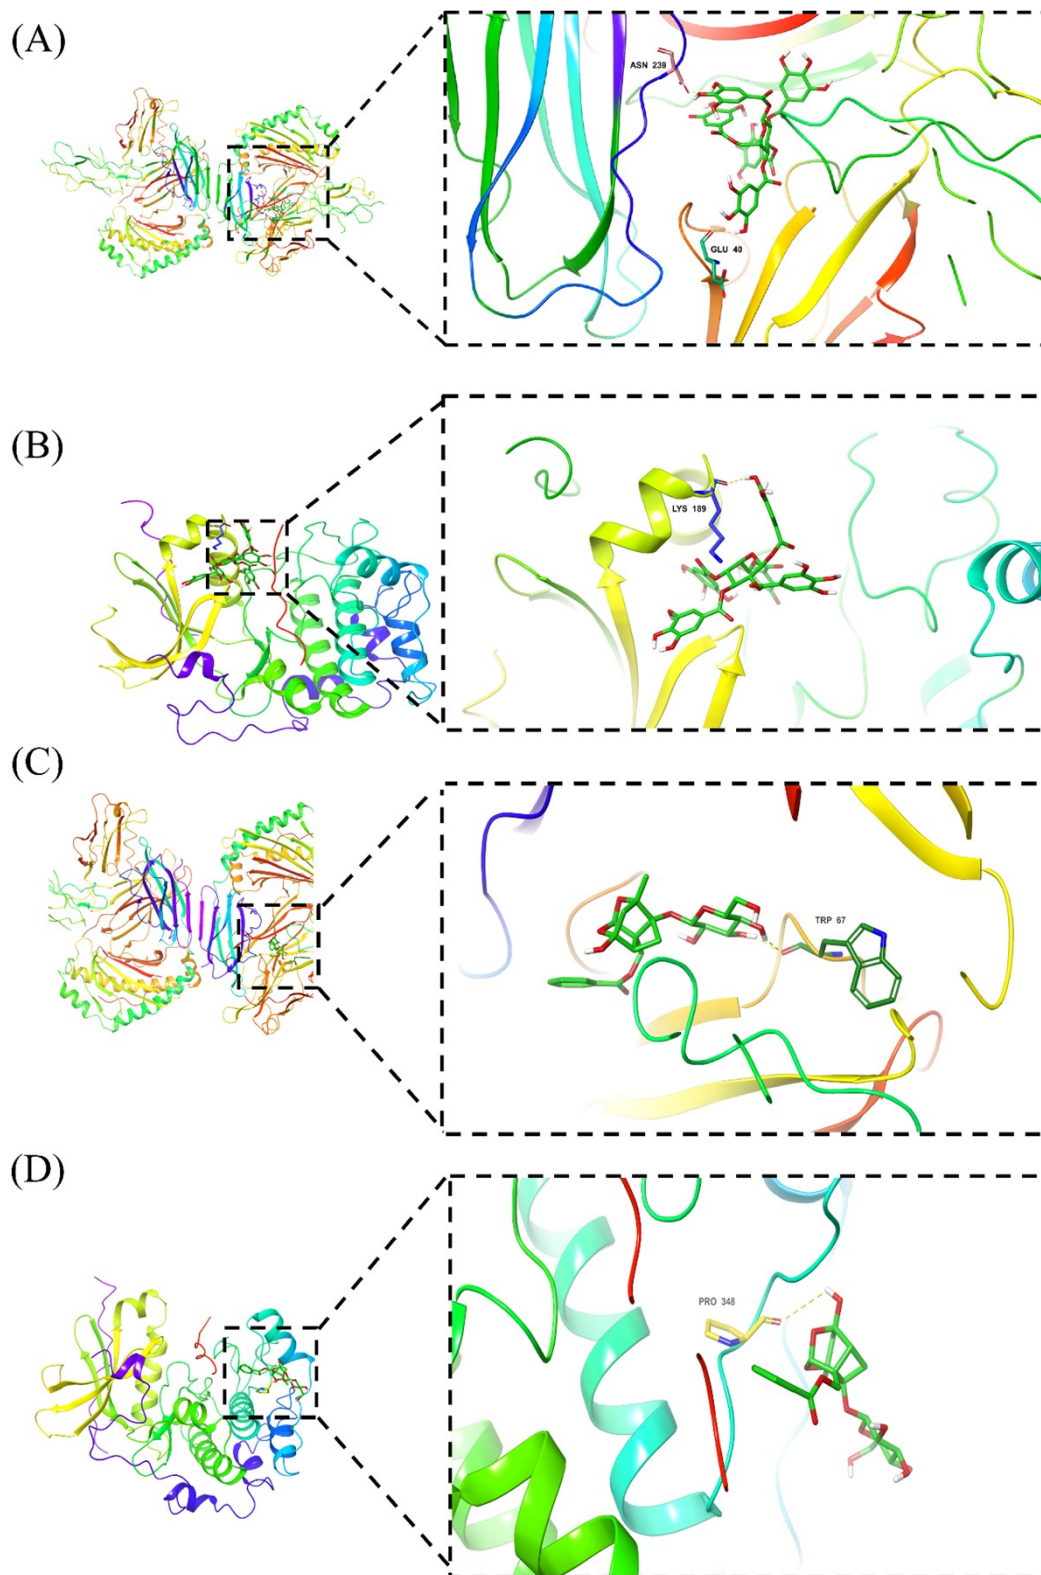

Fig.S7 Molecular docking results.

(A)1,2,3,4,6-O-Pentagalloylglucose-ACTB, (B) 1,2,3,4,6-O-Pentagalloylglucose-AKT1,

(C)paeoniflorin-ACTB, (D) paeoniflorin-AKT1.

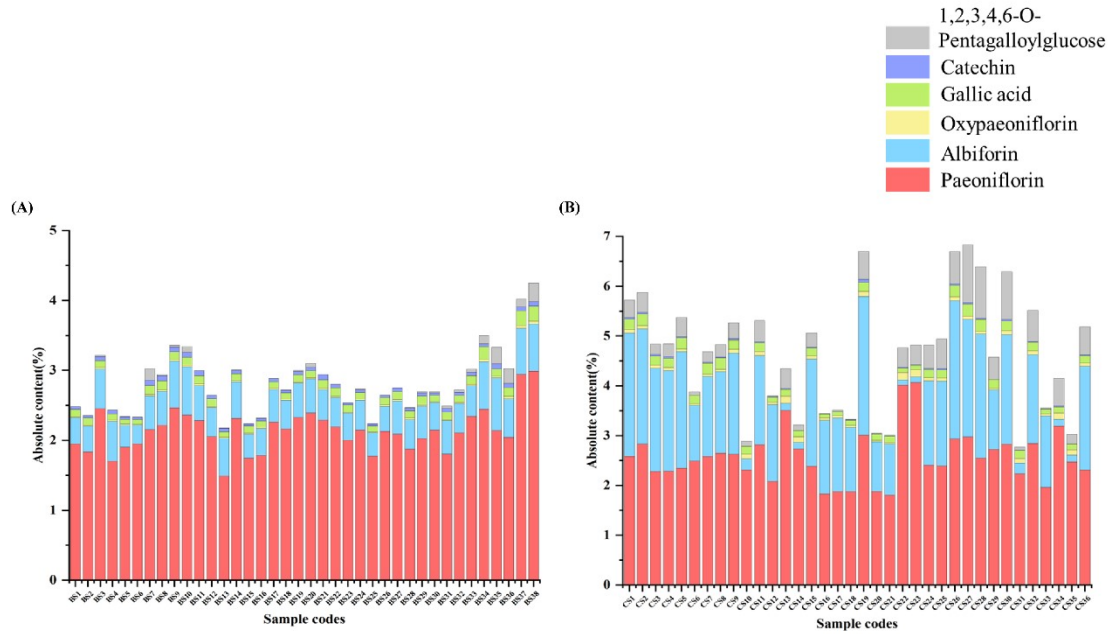

Fig. S8 Histograms of the mean content of paeoniflorin, albiflorin, oxypaeoniflorin, gallic acid, catechin, 1,2,3,4,6-O-Pentagalloylglucose. (A) PRA samples, (B) PRR samples.

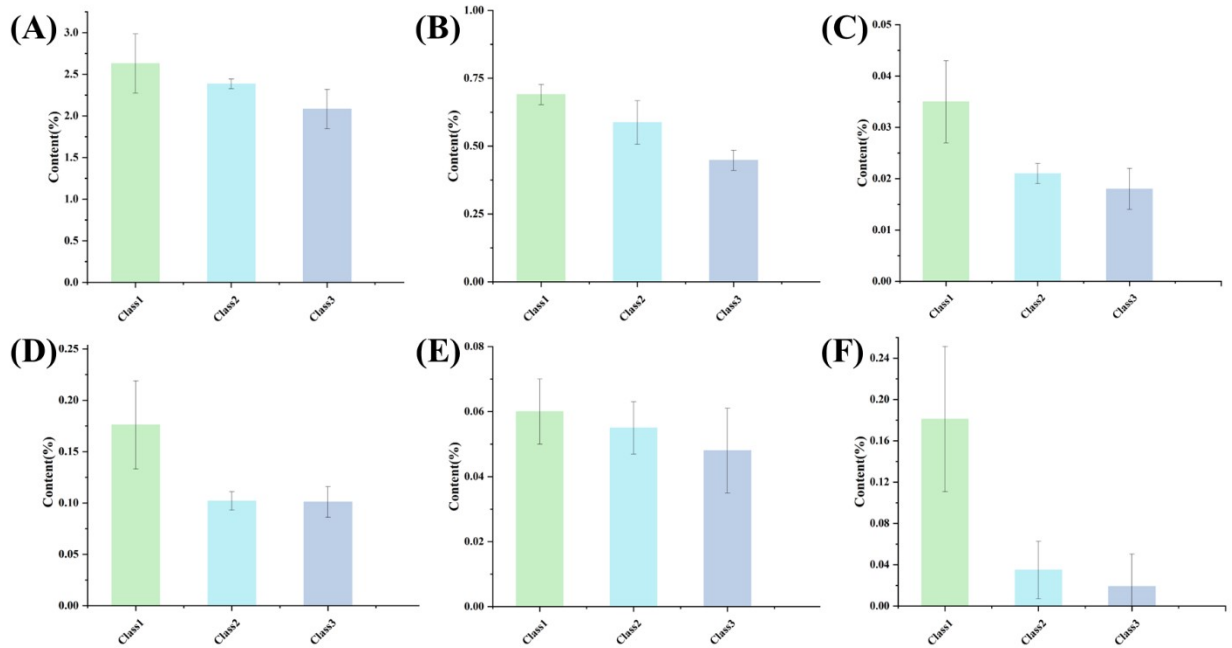

Fig. S9 Distribution of average content of PRA samples.

(A)paeoniflorin, (B) albiflorin, (C) oxypaeoniflorin, (D) gallic acid, (E) catechin, (F) 1,2,3,4,6-O-Pentagalloylglucose.Class1.vs Class2.vs Class3.

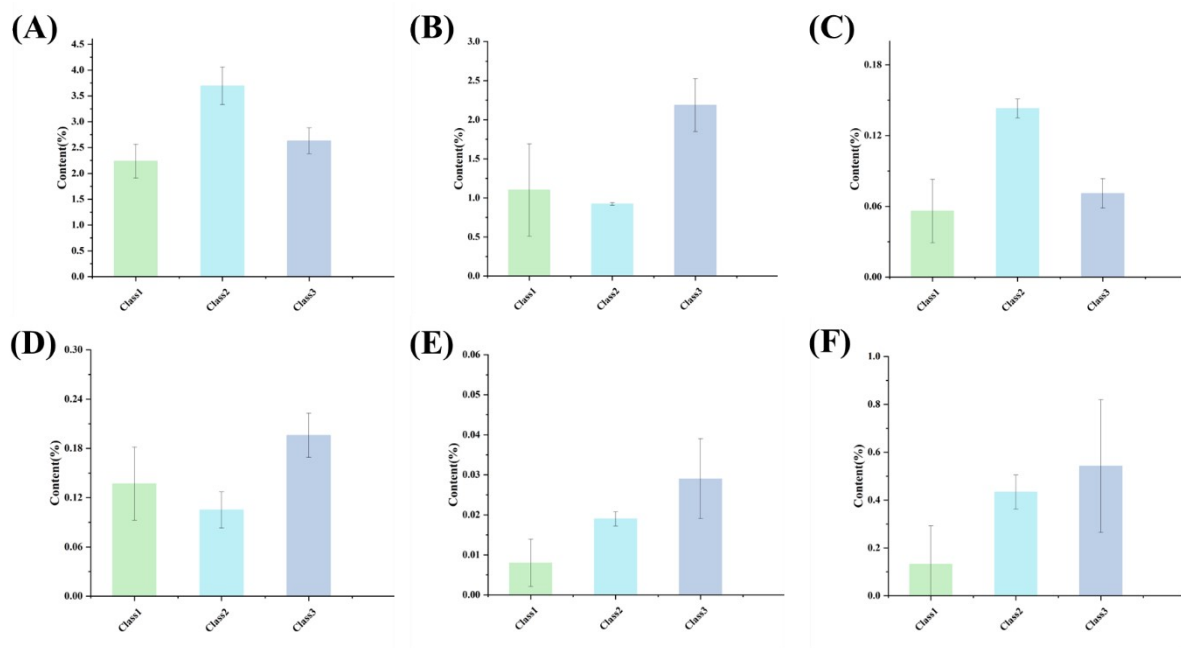

Fig. S10 Distribution of average content of PRR samples.

(A) paeoniflorin, (B) albiflorin, (C) oxypaeoniflorin, (D) gallic acid, (E) catechin, (F) 1,2,3,4,6-O-Pentagalloylglucose.Class1.vs Class2.vs Class3.
